# Supplementary material
Source: PubMed Central journal article supplement (PMC8790209)
Supplement: mmc1.pdf [file mmc1.pdf]

**Biophysical Journal, Volume 121**

**Supplemental information**

**FiberSim: A flexible open-source model  
of myofilament-level contraction**

**Sarah Kosta, Dylan Colli, Qiang Ye, and Kenneth S. Campbell**

# FiberSim: a flexible open-source model of myofilament-level contraction

## Supporting Material

S. Kosta<sup>1</sup>, D. Colli<sup>1</sup>, Q. Ye<sup>2</sup>, K. S. Campbell<sup>1</sup>

<sup>1</sup> Department of Physiology, University of Kentucky, Lexington, Kentucky, USA

<sup>2</sup> Department of Mathematics, University of Kentucky, Lexington, Kentucky, USA

## ISOMETRIC TWITCH

Fig. S1 shows an isometric twitch simulation similar to the one presented in [https://campbell-muscle-lab.github.io/FiberSim/pages/demos/getting\\_started/isometric\\_twitch/isometric\\_twitch.html](https://campbell-muscle-lab.github.io/FiberSim/pages/demos/getting_started/isometric_twitch/isometric_twitch.html), except that the number of thick filaments is increased from 16 to 196. The simulation takes approximately 30 minutes to run on a standard Windows laptop, using 3 of the 4 processors (meaning that other tasks still can be performed during the FiberSim simulations). As a comparison, an equivalent simulation performed with MUSICO (with 200 thick filaments) takes approximately 10 hours on a system with 192 processors (2).

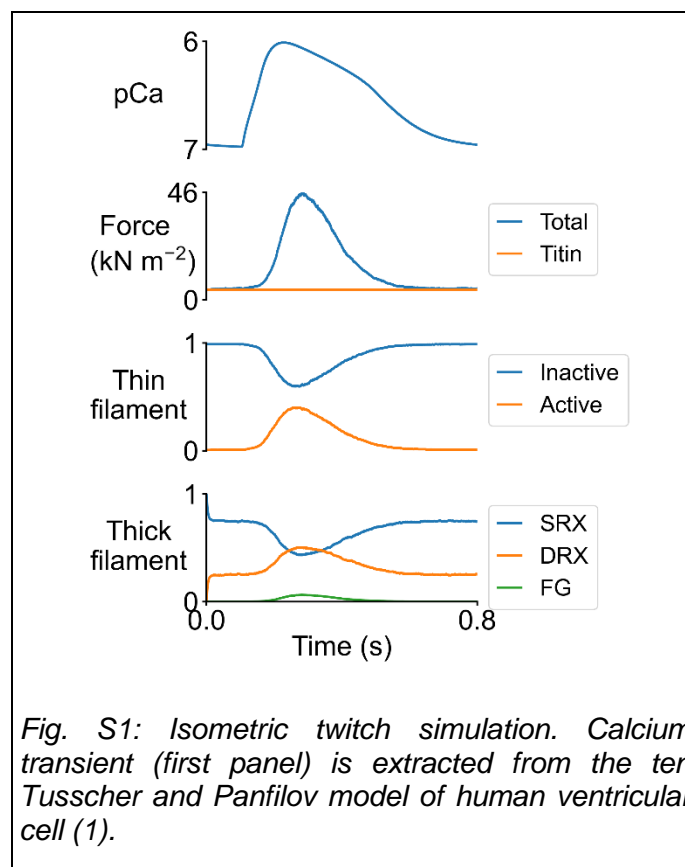

## TIME-STEP

Fig. S2 shows four isometric activations similar to the one presented in [https://campbell-muscle-lab.github.io/FiberSim/pages/demos/getting\\_started/isometric\\_activation/isometric\\_activation.html](https://campbell-muscle-lab.github.io/FiberSim/pages/demos/getting_started/isometric_activation/isometric_activation.html). Each simulation is run with a different (constant) time-step.

Since the thin filament kinetics model is associated with the fastest rates, this will determine the maximal time-step we should use. The probability for a regulatory unit to activate is calculated using  $k_{on} \cdot [Ca^{2+}]$ , where in the model files from the presented demos  $k_{on}$  is equal to  $3 \cdot 10^7 \text{ M}^{-1} \text{ s}^{-1}$ . Thus, for an isometric activation such as the one presented in Fig. S2, the activation rate is given by  $3 \cdot 10^7 \cdot 10^{-4} = 3000 \text{ s}^{-1}$ . The chosen time-step  $\Delta t$  should be small enough so that  $\Delta t < \frac{1}{3000} \sim 3 \cdot 10^{-4} \text{ s}$ . We chose to work with  $\Delta t = 10^{-4} \text{ s}$  in all the simulations presented in this paper. According to Fig. S2, this step size is enough to accurately describe thin and thick filaments activation while keeping a reasonable computational time.

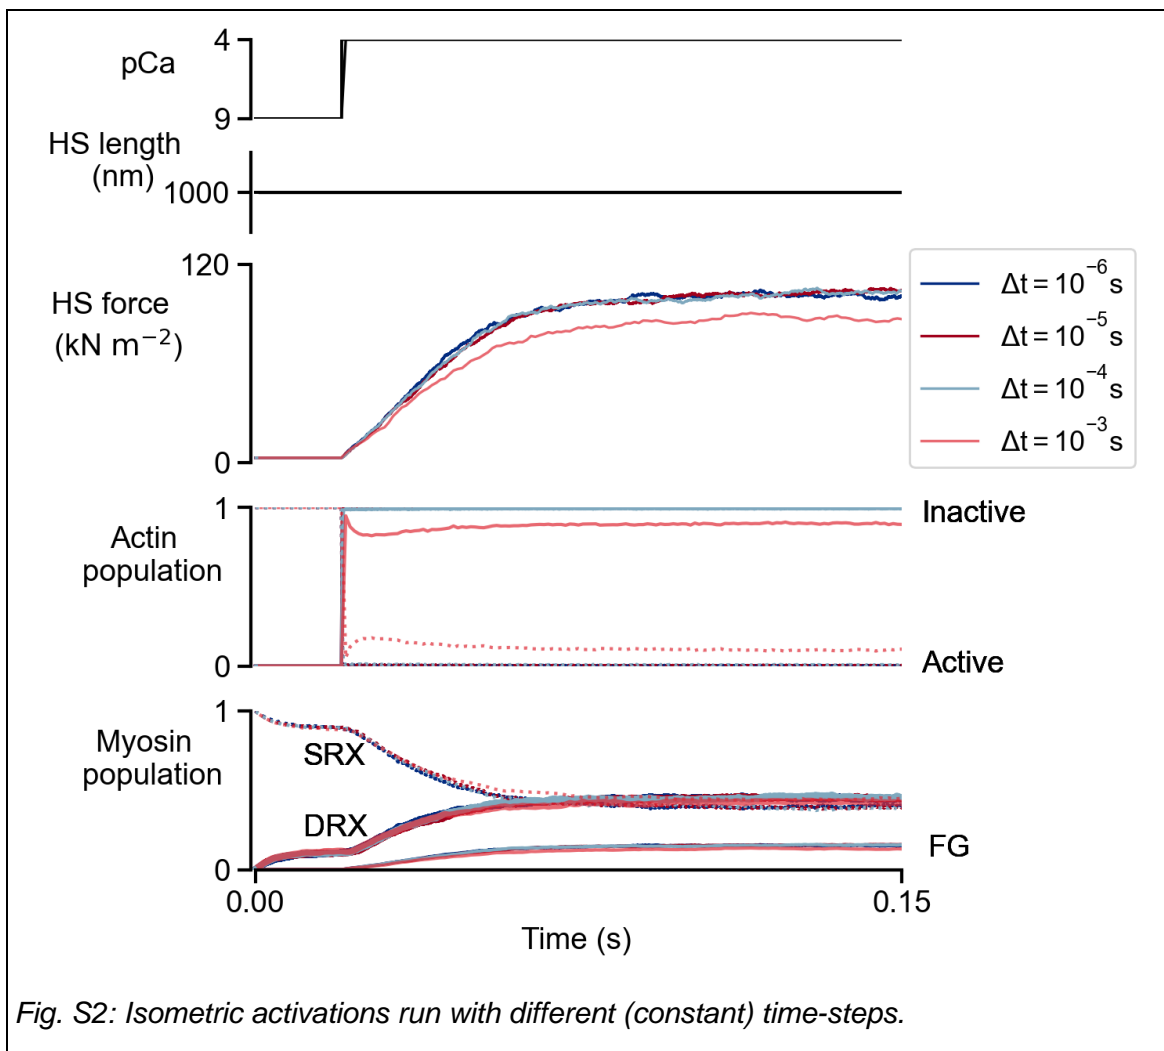

## THIN FILAMENT ACTIVATION CURVES

Fig. S3 shows two thin filament activation curves. The active binding sites proportion is calculated at different calcium concentrations in the absence of cross-bridges. When cooperativity is turned off ( $\gamma_{\text{coop}} = 0$ ), the Hill coefficient is close to 1. When cooperativity is turned on ( $\gamma_{\text{coop}} = 10$ ), the Hill coefficient increases to  $\sim 4$ . This last curve is in good agreement with the experimental data from (3).

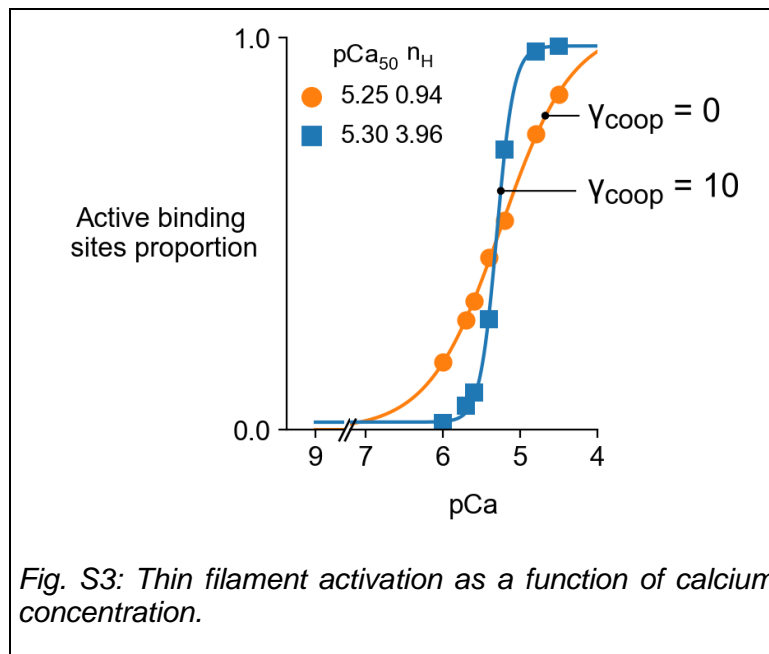

## SUPPORTING REFERENCES

1. ten Tusscher, K. H., and A. V. Panfilov. 2006. Alternans and spiral breakup in a human ventricular tissue model. *Am J Physiol Heart Circ Physiol.* 291(3):H1088-1100, doi: 10.1152/ajpheart.00109.2006.
2. Mijailovich, S. M., M. Prodanovic, C. Poggesi, M. A. Geeves, and M. Regnier. 2021. Multiscale modeling of twitch contractions in cardiac trabeculae. *J Gen Physiol.* 153(3):e202012604, doi: 10.1085/JGP.202012604.
3. Kampourakis, T., Y. B. Sun, and M. Irving. 2016. Myosin light chain phosphorylation enhances contraction of heart muscle via structural changes in both thick and thin filaments. *Proc Natl Acad Sci U S A.* 113:E3039-E3047, doi: 10.1073/pnas.1602776113.
