# Supplementary material
Source: PubMed Central journal article supplement (PMC8790209)
Supplement: mmc2.pdf [file mmc2.pdf]

# FiberSim: A flexible open-source model of myofilament-level contraction

Sarah Kosta,<sup>1,\*</sup> Dylan Colli,<sup>1</sup> Qiang Ye,<sup>2</sup> and Kenneth S. Campbell<sup>1</sup>

<sup>1</sup>Department of Physiology, University of Kentucky, Lexington, Kentucky and <sup>2</sup>Department of Mathematics, University of Kentucky, Lexington, Kentucky

**ABSTRACT** FiberSim is a flexible open-source model of myofilament-level contraction. The code uses a spatially explicit technique, meaning that it tracks the position and status of each contractile molecule within the lattice framework. This allows the model to simulate some of the mechanical effects modulated by myosin-binding protein C, as well as the dose dependence of myotropes and the effects of varying isoform expression levels. This paper provides a short introduction to FiberSim and presents simulations of tension-pCa curves with and without regulation of thick and thin filament activation by myosin-binding protein C. A myotrope dose-dependent response as well as slack/re-stretch maneuvers to assess rates of tension recovery are also presented. The software was designed to be flexible (the user can define their own model and/or protocol) and computationally efficient (simulations can be performed on a regular laptop). We hope that other investigators will use FiberSim to explore myofilament level mechanisms and to accelerate research focusing on the contractile properties of sarcomeres.

**SIGNIFICANCE** Myotropes, such as omecamtiv mecarbil and mavacamten, are new therapeutics that bind directly to sarcomeric proteins. Their clinical development has reenergized interest in mechanistic understanding of sarcomere level function. FiberSim is an open-source spatially explicit computer model that simulates myofilament level mechanics and can predict how modulating the function of a sarcomeric protein will impact contractility. The software was specifically designed to be flexible and user friendly and may help to further accelerate myofilament research.

## INTRODUCTION

Different approaches exist to model myofilament-level contraction. For example, Andrew Huxley's original work (1) simulated myofilament dynamics using a system of partial differential equations to determine the time evolution of a two-state model for myosin (bound or unbound to actin). Classical Huxley-type models describe the time-dependent probability that a given myosin molecule is in a particular biochemical state, and the dynamic changes in those probabilities are governed by partial differential equations (2,3). Extensions of Huxley's initial model have been implemented to add multiple actin binding sites (4) or cooperativity between myosin heads (2,3). Our laboratory developed MyoSim (5), a Huxley-type model that can reproduce many features of contractile dynamics (6,7). However, models based on Huxley's approach do not incorporate the three-dimensional configuration of the sarcomere lattice

and do not implement all of the spatial constraints on protein interactions.

Spatially explicit models of myofilaments track the position and status of each contractile protein in the sarcomere lattice. These models typically run more slowly than Huxley-type systems and are more complicated to program. However, they may provide a more accurate description of contractile function, as the spatial arrangement of proteins within the sarcomere is likely to impact the underlying biophysics (8). Even if the spatial constraints can be implemented in Huxley-type models, this requires additional assumptions. A simple comparison of the strengths and weaknesses of each approach (Huxley-type and spatially explicit) is provided in Table 1.

To the authors' knowledge, Daniel, Trimble, and Chase (9) developed the first spatially explicit model of a half-sarcomere. This initial model introduced the concept of compliant realignment of myosin heads and actin binding sites and spurred further work (10), including Fenwick et al.'s study of the spatial distribution of thin filament activation (11). Arguably the most sophisticated model to date is MUSICO, developed by Mijailovich et al. (12). This

Submitted June 17, 2021, and accepted for publication December 16, 2021.

\*Correspondence: [s.kosta@uky.edu](mailto:s.kosta@uky.edu)

Editor: Samantha Harris.

<https://doi.org/10.1016/j.bpj.2021.12.021>

© 2021 Biophysical Society.

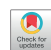

**TABLE 1 Simple comparison of Huxley-type and spatially explicit models**

|                      | Huxley type                             | Spatially explicit           |
|----------------------|-----------------------------------------|------------------------------|
| Spatial constraints  | Possible (with additional calculations) | Implicit                     |
| Computational time   | Fast                                    | Slow                         |
| Number of parameters | Low                                     | High                         |
| Numerical algorithm  | Partial differential equations          | Stochastic and force-balance |

important model simulates the activation of both thin and thick filaments and has provided important new insights into sarcomere-level function (13).

FiberSim (<https://campbell-muscle-lab.github.io/FiberSim/>) builds on the pioneering work described above (9–13), but was developed with a special emphasis on usability and flexibility. The user can vary the biophysical properties of each contractile protein and simulate different types of protocols. Many types of simulations, including those included as demonstrations on the website, can be run in a few minutes on a standard laptop. This makes FiberSim more accessible to most users than prior spatially explicit models.

The following sections provide additional details about the FiberSim model and present example simulations demonstrating how myosin-binding protein C (MyBP-C) can modulate contractile function via localized effects within the sarcomere lattice. Another example shows the dose-dependent response to mavacamten, a myosin-targeting drug. Finally, slack/re-stretch maneuvers are also presented.

## METHODS

FiberSim describes the contractile properties of a half-sarcomere composed of thick and thin filaments. The underlying framework is similar to that described by groups led by Daniel, Chase, Tanner, and Mijailovich (9,10,12). The code tracks the position and status of each myosin head, each binding site on actin, and each MyBP-C molecule. The software is separated into two components:

- FiberCpp is the core model and implements the calculations underlying the myofilament system. It is written in C++ and designed solely to run quickly and efficiently. The results of the simulations are written to files using standard formats for portability and efficiency.
- FiberPy is the interface. This part of the software is written in Python to facilitate rapid development and flexibility. It provides options to run simulations, analyze simulation outputs, visualize the FiberSim framework, make figures and fit simulations to experimental data.

## Computational structure

As shown in Fig. 1, FiberSim requires three input files to run a simulation:

1. The protocol file is a tab-delimited text file with four columns: the time step, the pCa value ( $pCa = -\log_{10} [Ca^{2+}]$ ), the imposed length change (held at 0 for isometric), and the mode of contraction (length-control or force-control mode). Each new line of the protocol file represents an additional time step.
2. The model file is a JSON file that describes the half-sarcomere lattice structure and the filament kinetics (see below). JSON is a file format for storing and transporting data that is simple and human-readable. Each parameter value comes with a key, which simplifies the process of adding new features to FiberSim as understanding of sarcomere biology evolves.

3. The options file is a JSON file that provides settings, such as the tolerance limit for the force-balance calculations and whether to create log files that track the status of the filaments throughout the simulations.

## Sarcomere lattice and filament structure

Fig. 2 A shows a rendering of the half-sarcomere lattice. Myosin heads are arranged in dimers and can attach to available binding sites on the nearest thin filaments. Thick and thin filaments located at the edge of the lattice are mirrored on the opposite side to minimize edge effects (10,11).

FiberSim tracks the location of filament nodes, where either actin binding sites, myosin heads, or MyBP-C molecules are located. (To our knowledge, FiberSim is the first spatially explicit model to incorporate MyBP-C.) Fig. 2 B shows a simplified two-dimensional representation of a single thin and a single half-thick filament. Nodes on each filament are joined by linear springs to account for the filaments' compliance. The thick filament is connected to the M-line by a rigid link to represent the bare zone. In 3D, titin springs link each thick filament to the six nearest thin filaments.

The model file defines the number of filaments in the simulation as well as structural and biophysical properties, including the number of binding sites per filament, the stiffness of the compliant link, and the rate functions defining binding site and myosin kinetics. The models provided in the demonstrations on the website are intended to mimic striated muscle structure so that:

- Each thin filament node holds two diametrically opposed binding sites, each of which can be available (active) or not available (inactive) for myosin binding.
- Each thick filament node holds six myosin heads arranged in three dimer pairs. Each myosin head can bind to a nearby active actin binding site. Again, to our knowledge, FiberSim is the first spatially explicit in which paired myosin heads can interact to form a super-relaxed state (14).

## Force-balance calculations

FiberSim stores the distance of each node from the Z-line in an x-position vector. Thus, this vector holds information about the position of each molecule within the lattice structure. At each simulation time-step, the x-position vector is calculated by assuming that forces are balanced at each node (9).

FiberSim performs this calculation using an iterative approach based on the conjugate gradient method (15). This approach takes advantage of the sparsity of the stiffness matrix originally described by Daniel et al. (9). The iterative approach is much faster and requires less memory than solving the full matrix equation using direct methods.

The complexity of the calculations depends on the total number of nodes (N). The conjugate gradient method solves the force-balance calculation using an algorithm where the number of calculations and the memory required scale linearly with N. This is normally written as  $O(N)$ . In contrast, the most efficient direct methods scale as  $O(N^3)$  and require  $O(N^2)$  memory (15). For a system with 100 thick filaments, the conjugate gradient method is approximately  $100^2 = 10,000$  times faster.

An example of an isometric twitch simulation (with 196 thick filaments) is provided in Fig. S1 in the Supporting material. This simulation runs in approximately 30 min on a standard Windows laptop, using three of the four processors to perform the calculations. (Simulations with a smaller number of thick filaments, including those demonstrated on the project website, run much faster but have more stochastic noise.) As a comparison,

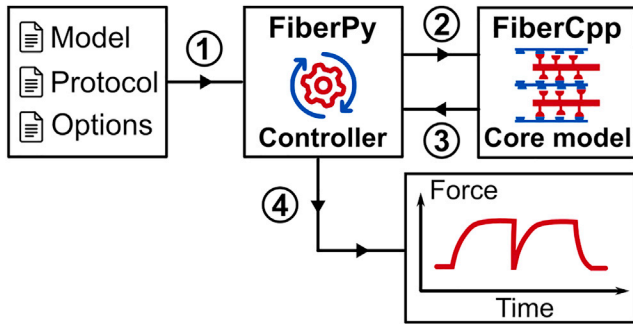

FIG. 1 The FiberSim framework. FiberPy is the Python code that handles communication with the core model. FiberCpp is the C++ code that simulates the myofilament level biophysics. Once the simulation is complete, FiberCpp writes the results of the calculations to an output file. FiberPy analyzes the results, summarizes the data, and creates figures such as those presented in Fig. 4. FiberPy can also create lattice snapshots such as the one shown in Fig. 2 A.

MUSICO takes approximately 10 h on a system with 192 processors to simulate a comparable experiment (13).

The constant time step that is defined in the protocol file also impacts the computational time. Fig. S2 compares FiberSim simulations run with different time steps. The results show that a time step of  $10^{-4}$  s is enough to provide numerical accuracy for the time evolution of thin and thick filaments activation under the conditions used in our demonstrations.

### Thin filament and thick filament kinetics

In FiberSim, the two actin strands forming the thin filament are composed of regulatory units. Each thin filament regulatory unit consists of seven consecutive active binding sites which switch simultaneously between an inactive or active state, depending on the calcium concentration and on the transition rate constants  $k_{on}$  and  $k_{off}$ . Those parameters are defined by the user. A cooperative mechanism is also implemented such that:

$$\begin{cases} k_{\text{activate}} = k_{\text{on}} \cdot (1 + n \cdot \gamma_{\text{coop}}) \\ k_{\text{deactivate}} = k_{\text{off}} \cdot (1 + [2 - n] \cdot \gamma_{\text{coop}}) \end{cases}$$

where  $n$  is the number of adjacent regulatory units in the active state ( $n = 0, 1$  or  $2$ ), and  $\gamma_{\text{coop}}$  defines how the status of each unit is influenced by its immediate neighbors.

In FiberSim, a single bound myosin prevents all seven of the binding sites in a regulatory unit from inactivating. Although the model only has two explicit thin filament states, it mimics some of the features of the biochemical open state of thin filament, which cannot return to the blocked state, even in the absence of calcium (16). Fig. S3 shows activation curves for the thin filament as a function of calcium concentration. These curves are in good agreement with experimental data of thin filament activation measured with fluorescent probes (17).

The kinetic scheme and the rate constants for individual myosin heads are defined by the user. The stochastic approach described in (18) is used to determine which transitions occur during each time step.

### Software availability

FiberSim is available for free download under the GPL3 license. Full documentation and examples are available at the project home page, <https://campbell-muscle-lab.github.io/FiberSim/>. Source code, bug reports, and development plans are provided at <https://github.com/campbell-muscle-lab/FiberSim/>. This article describes release version 2.0.2, which is archived at <https://doi.org/10.5281/zenodo.4929389>.

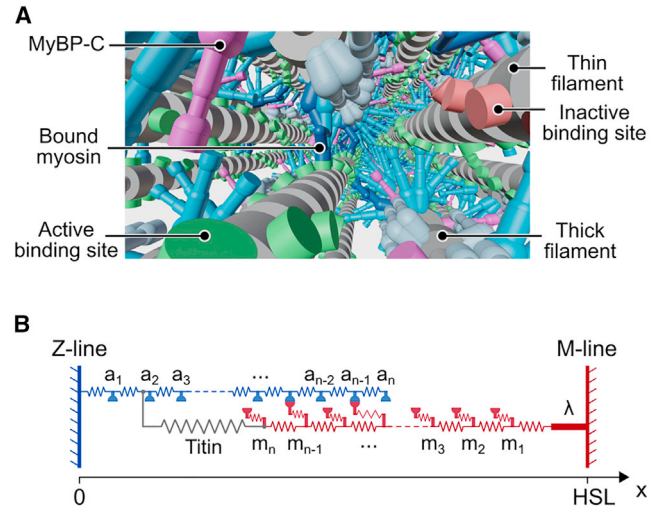

FIG. 2 Half-sarcomere lattice. (A) Rendering of the half-sarcomere lattice. Myosin heads from the thick filament can attach to binding sites on the surrounding thin filaments. This sarcomere lattice snapshot is generated using Blender (an open-source visualization software available at <https://www.blender.org/>). (B) A two-dimensional representation of a thin and a thick filament from the half-sarcomere lattice. Each filament is compliant, and represented as a series of nodes connected by linear springs. Actin binding sites are located on the thin filament nodes. Myosin heads and MyBP-C are located on the thick filament nodes. The thick filament is linked to the M-line by a rigid link of length  $\lambda$  to represent the bare zone. HSL is the half-sarcomere length.

## RESULTS

The results presented in this section are reproduced from examples posted at <https://campbell-muscle-lab.github.io/FiberSim/pages/manuscripts/2021a/2021a.html> and <https://campbell-muscle-lab.github.io/FiberSim/pages/manuscripts/2021b/2021b.html>.

### MyBP-C

The first set of simulations investigate how one potential action of MyBP-C impacts contractile dynamics. Specifically, the calculations predict how contractile force is changed if MyBP-C stabilizes the super-relaxed state of myosin and/or binds to actin (19–21).

The calculations simulate a half-sarcomere lattice containing 100 thick and 200 thin filaments. Myosin heads cycle through the three-state model (6) shown in Fig. 3 that includes a super-relaxed (SRX) state.

Dimers of myosin heads can transition together from the SRX state (gray structures in Fig. 2 A) to the disordered-relaxed state (DRX, light blue structures in Fig. 2 A). Then, each myosin head is able to bind to an available actin binding site and transition to a force-generating state (dark blue structures in Fig. 2 A).

Two sets of simulations are presented. In the base model, MyBP-C molecules (pink structures in Fig. 2 A) are

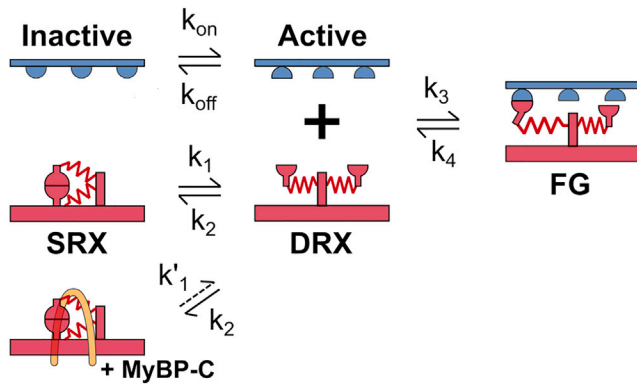

FIG. 3 Example of a three-state myosin kinetic model. Myosin dimers (red) can transition together between the SRX state and the DRX. Then they can transition independently to a force-generating state. Attachment to actin (blue) and force generation are only allowed if the binding site is available for binding (active state). Rate constants ( $k_i$ ) can be constant or depend on stretch, node force, and/or on the MyBP C status.

assumed to have no effect. Thus,  $k'_1$  in Fig. 3 is equal to  $k_1$ . In the MyBP-C stabilized model,  $k'_1$  for myosin dimers in the C-zone is reduced by 30%.

Fig. 4 A and B show simulations for an isometric activation protocol at  $pCa = 5.6$  in the base case and in the MyBP-C stabilized SRX case. Fig. 4 C shows normalized tension- $pCa$  curves generated by running the isometric activation protocols with different  $pCa$  values. Each tension- $pCa$  curve simulation runs in approximately 15 min on a regular laptop. Interestingly, there is a rightward shift of the tension- $pCa$  curve when MyBP-C stabilizes SRX heads in the C-zone ( $pCa_{50} = 5.63$  compared with  $pCa_{50} = 5.69$  in the base case).

Since the model is spatially explicit, the proportion of binding sites and myosin heads in each state can be calculated as a function of their distance from the Z-line. Fig. 5 shows snapshots at steady state along with a schematic representation of the half-sarcomere.

In this model,  $k_1$  and  $k'_1$  are assumed to be force dependent (6). Force increases toward the M-line in a spatially explicit model so the relative population of the DRX state increases with the  $x$ -coordinate in the base simulation. This underlies a parallel increase in the number of force-generating heads at the M-line end.

In the MyBP-C-stabilized SRX condition, the SRX to DRX transition is slowed in the C-Zone. Consequently, the number of force-generating heads is reduced and force- $pCa$  curves are shifted to the right (lower  $pCa_{50}$ , reduction in  $Ca^{2+}$  sensitivity, Fig. 4 C).

Movies showing the time evolution of the spatial population distribution with and without MyBP-C stabilization are available at <https://campbell-muscle-lab.github.io/FiberSim/pages/manuscripts/2021a/2021a.html>.

There is also experimental evidence suggesting that MyBP-C can bind to actin (21). Fig. 6 A shows simulations investigating some of the contractile consequences of this mechanism. MyBP-C can compete with myosin heads for binding sites on actin. If an MyBP-C molecule binds, it acts as an additional cross-link with stiffness  $k_{pc}$  and, thus, creates a drag force during interfilamentary movement. Similar to bound myosin heads, bound MyBP molecules also prevent the regulatory unit from deactivating. MyBP-C can thus contribute to myofilament cooperativity. When MyBP-C is attached, it is assumed that it is not stabilizing the SRX state of myosin dimers anymore.

The four tension- $pCa$  curves shown in Fig. 6 B correspond with four situations. The first two are the base case and the MyBP-C stabilized SRX case described earlier. The last two correspond with MyBP-C binding to actin only (unbound MyBP-Cs do not stabilize SRX), and to MyBP-C stabilized SRX together with actin binding (unbound MyBP-Cs stabilize SRX). When the only MyBP-C effect is actin binding, there is an increase in calcium sensitivity, but no substantial change in maximal isometric force. When MyBP-C can bind to actin and

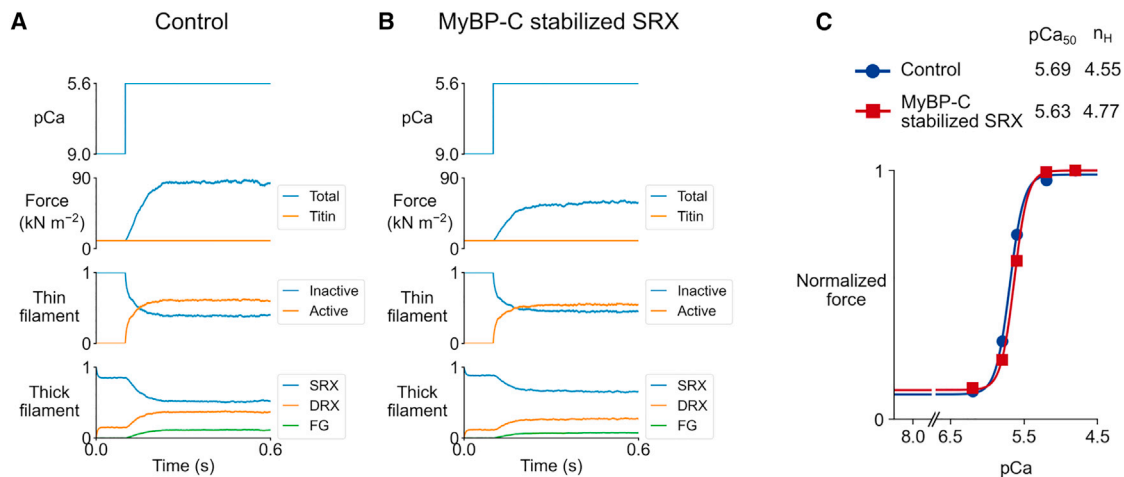

FIG. 4 Isometric contractions at constant calcium activation and tension- $pCa$  curves. Isometric contraction at  $pCa = 5.6$  and half-sarcomere length (HSL) =  $1.2 \mu m$  for the (A) base and (B) MyBP-C stabilized SRX case. (C) Tension- $pCa$  curves built from isometric contractions at different  $pCa$  values.

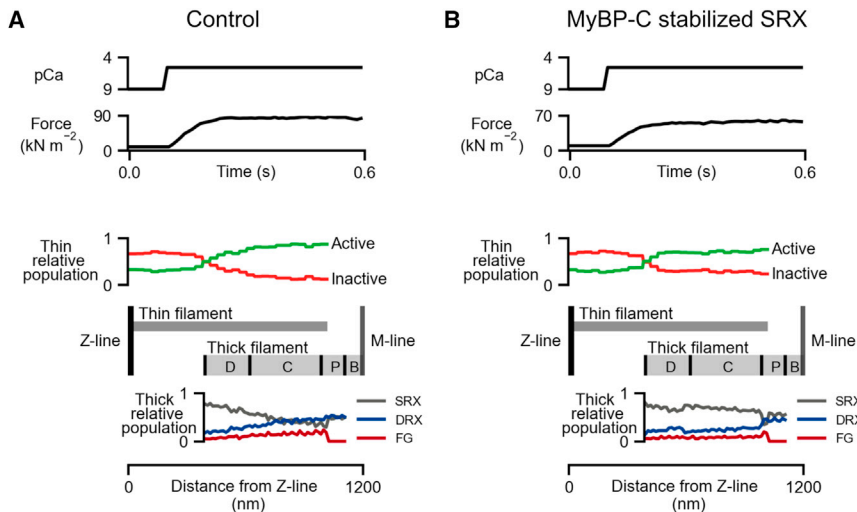

FIG. 5 Intra-half-sarcomere heterogeneity. Panels show the relative populations of the actin and myosin states at steady state plotted against distance from the Z-line for (A) base and (B) MyBP C stabilized SRX conditions.  $pCa = 5.6$  where isometric force is approximately 70% of maximum.

also stabilize the SRX when unbound,  $Ca^{2+}$  sensitivity is enhanced but maximum force is reduced.

### Mavacamten

Myotropes, such as omecamtiv mecarbil and mavacamten, are new therapeutics that bind directly to sarcomeric proteins (22). The next set of simulations show that it is possible to produce a dose-dependent curve associated with a drug such as mavacamten (Mava). This myotrope has been shown to stabilize the SRX state of myosin (23). In the model, Mava-free myosins have the same kinetics scheme as the one presented in Fig. 3, and Mava-bound myosins have a decreased  $k_1$  ( $k'_1 = 0.1 k_1$ ) (Fig. 7). More precisely, as both myosin heads form a dimer transition together in and out of the SRX state, a Mava molecule bound to the first myosin head of any dimer will decrease the rate of transition to the DRX state for this dimer.

The steady-state proportion of myosin heads bound by Mava can be calculated as a function of the Mava concentration using the experimental data from (24). This prediction can then be integrated into FiberSim to predict a dose-response curve for maximum isometric force (Fig. 7 C). This curve qualitatively compares to the ATPase dose-dependent curve shown in Fig. 4 from (24).

### $k_{tr}$ Maneuvers

The last demo shows a slack/re-stretch (or  $k_{tr}$ ) maneuver simulation. Results from two different simulations at full calcium activation are provided in Fig. 8. In the first simulation, myosin heads can only bind to the nearest binding site (number of potential binding sites set to 1, see Fig. 8 A). In the second simulation myosin heads can bind to one of the three nearest binding sites (number of potential binding sites set to 3, see Fig. 8 B).

For the slack/re-stretch protocol, the half-sarcomere length is suddenly decreased by 5%, held constant for 40 ms and then stretched back to its initial value. The imposed variations in half-sarcomere during this maneuver are shown in Fig. 8 C (“Length command”, dashed lines), but they do not always match the real half-sarcomere length (“Length”, solid line). This is because, during rapid shortening, the force falls to zero and the half-sarcomere becomes slack. FiberSim tracks the moment at which the force reaches zero and switches the contraction mode from isometric to isotonic. The half-sarcomere then shortens against no load, until force redevelops. As soon as this occurs, FiberSim switches to the isometric mode again, and the “Length command” and “Length” curves match. This mimics the experimental situation in which a fiber that becomes slack falls out of plane so that the distance between the ends of the preparation is no longer indicative of the half-sarcomere length.

Force recovery traces are shown in Fig. 8 C. Each curve reproduces the typical residual force (force not dropping to zero) observed experimentally during the re-stretch phase (25). The simulation with three potential binding sites shows a greater force residual, as well as greater isometric force compared with the simulation with one potential binding site.

### DISCUSSION

FiberSim runs on standard PCs and can simulate typical experiments in a few minutes. The software was designed to be flexible and users can define their own simulation protocols, adjust the structural details of the filament models, and implement different types of myosin and MyBP-C kinetics. It is also possible to simulate the action of myotropes. More demonstrations, including isometric twitch contractions and simulations of force-velocity relationships, are provided on the FiberSim website.

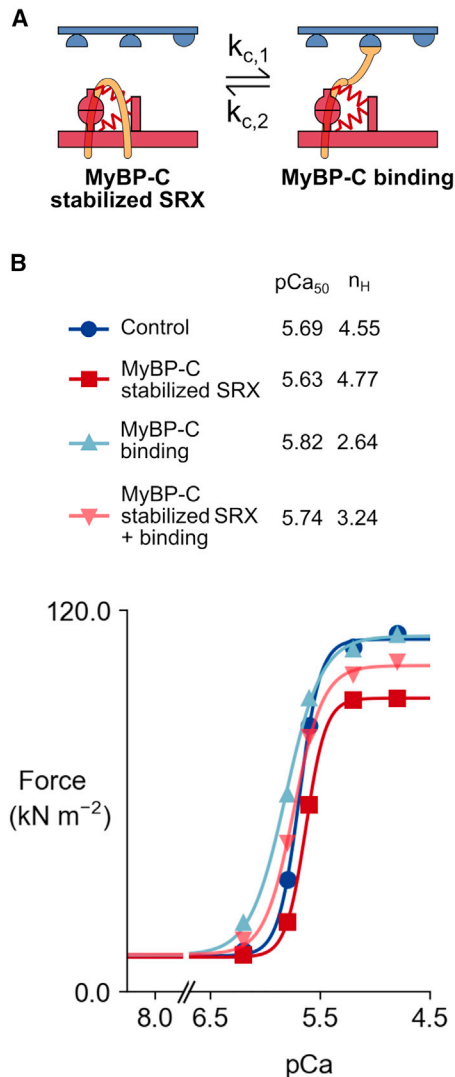

FIG. 6 MyBP-C potential roles on thick and thin filaments, and its impact on tension-pCa curves. (A) MyBP-C interaction with the thick and thin filaments. MyBP-C stabilizes the SRX state of myosin dimers. MyBP-C is also able to bind to nearby active binding sites. (B) Tension-pCa curves for the four situations (base, MyBP-C stabilized SRX only, MyBP-C binding only, and MyBP-C stabilized SRX + MyBP-C binding).

The spatially explicit aspect of FiberSim allows for the precise description of local behaviors at the molecular level. For instance, myosin heads can only bind to nearby sites and may be blocked by competitive binding. Similarly, SRX to DRX transitions can depend on the local force in the thick filament. This leads to intra-half-sarcomere effects such as in Fig. 5 A where the DRX population increases toward the M-line as the force in the thick filament backbone accumulates.

MyBP-C also exhibits local effects due to its restricted location within the sarcomere, such as the decrease in DRX and force-generating myosin populations in the C-zone upon MyBP-C stabilization of the SRX (Fig. 5 B). This action of MyBP-C on the thick filament leads to a

decrease in calcium sensitivity and maximal isometric force (Figs. 4 C and 6 B, red curves). In contrast, when the sole MyBP-C effect is actin binding, there is an increase in calcium sensitivity. This is due to bound MyBP-C molecules activating the thin filament via its intrinsic cooperativity. However, at full calcium activation, where almost all binding sites are activated, enhancing cooperativity has no additional effect (Fig. 6 B, light blue curve). Thus, maximum force is comparable with that calculated for the base condition. When MyBP-C can bind to actin and also stabilize the SRX when unbound (Fig. 6 B, pink curve), Ca<sup>2+</sup> sensitivity is enhanced but maximum force is decreased (because more heads remain in the SRX state). This illustrates the complex role of MyBP-C that can act both as a cross-bridge inhibitor and a calcium sensitizer (21). It is worth mentioning that a model with a set of ordinary differential equations published by Walcott et al. (26) also investigated the potential role of MyBP-C binding to actin and competing with myosin heads, and it also showed that complex effects can arise from this regulatory mechanism. It is important to note that this model is based on motility assays data with solubilized MyBP-C fragments, and not on intact myofilaments.

The  $k_{tr}$  maneuvers shown in Fig. 8 qualitatively reproduce the typical force recovery pattern observed experimentally (25). More important, the simulations show that the number of potential binding sites for myosin impacts (1) the isometric force and (2) the residual force. This can be explained as follows: as additional binding sites are made available for myosin binding, more cross-bridges attach, and isometric force increases. During the re-stretch phase of the  $k_{tr}$ , force increases transiently as the attached heads are rapidly extended. This strains the links and the myosins detach quickly. However, in FiberSim, the detached heads are replaced almost immediately because the interfilamentary movement increases the probability of new myosin heads coming within range of an available binding site. Thus, rather than force dropping to near zero, FiberSim-based simulations of  $k_{tr}$  produce a large residual force (similar to that measured in experiments) that reflects an increased rate of myosin attachment during rapid interfilamentary movement. This type of effect can be built into Huxley-based models (27), but arises naturally in FiberSim because of its spatially explicit framework.

Spatially explicit frameworks are also useful for simulating the potential effects of MyBP-C. Since these regulatory molecules are localized to the C-zone of the half-sarcomere they can only exert a direct influence on a portion of the myosin heads. FiberSim handles this explicitly; some myosin heads are controlled by MyBP-C and others are not.

In summary, FiberSim is a new, open source computational tool for studying myofilament contraction. To the authors' knowledge, it is the first spatially explicit model to incorporate MyBP-C and to describe myosin dimers interacting to form a SRX state. The software is user friendly and the calculations run quickly enough that it can be

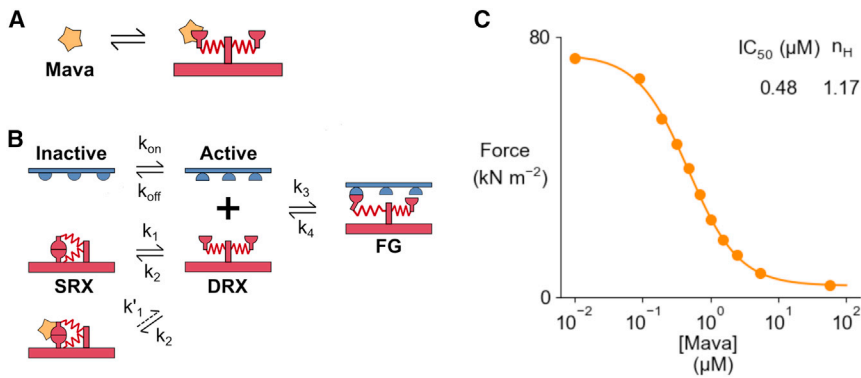

FIG. 7 Mava's role on myosin kinetics and dose-dependent response. (A) Mava is assumed to be in rapid equilibrium with myosin. (B) Kinetics model. Mava stabilizes the SRX state of myosin. (C) The maximal isometric force is computed for different fractions of Mava-bound myosins. It is then possible to plot the isometric force as a function of Mava concentration.

used effectively on standard laptops. We hope that other investigators will use FiberSim to explore myofibril level mechanisms and would be excited to collaborate with researchers who want to add additional features.

## SUPPORTING MATERIAL

Supporting material can be found online at <https://doi.org/10.1016/j.bpj.2021.12.021>.

## AUTHOR CONTRIBUTIONS

SK wrote the manuscript, helped develop the website and demonstrations, and optimized and tested FiberCpp. DC worked on prototypes of the codebase and developed the website and GitHub repository. QY helped optimize the force-balance algorithm in the core model. KC planned the overall project, wrote the first versions of FiberCpp and FiberPy, helped develop the demonstrations, and edited the final manuscript.

## ACKNOWLEDGMENTS

Supported by NIH HL146676, HL148785, TR001998, and AHA TP135689 to KSC, by AHA 829744 to SK, and by NSF DMS-1821144 to QY.

## SUPPORTING CITATIONS

Reference (28) appears in the [Supporting material](#).

## REFERENCES

- Huxley, A. F. 1957. Muscle structure and theories of contraction. *Prog. Biophys. Biophys. Chem.* 7:255–318.
- Walcott, S. 2013. A differential equation model for tropomyosin-induced myosin cooperativity describes myosin-myosin interactions at low calcium. *Cell Mol. Bioeng.* 6:13–25. <https://doi.org/10.1007/s12195-012-0259-2>.
- Walcott, S. 2014. Muscle activation described with a differential equation model for large ensembles of locally coupled molecular motors. *Phys. Rev. E Stat. Nonlin. Soft Matter Phys.* 90:042717. <https://doi.org/10.1103/PhysRevE.90.042717>.
- Hill, T. L. 1976. Theoretical formalism for the sliding filament model of contraction of striated muscle part II. *Prog. Biophys. Mol. Biol.* 29:105–159. [https://doi.org/10.1016/0079-6107\(76\)90021-3](https://doi.org/10.1016/0079-6107(76)90021-3).
- Campbell, K. S. 2014. Dynamic coupling of regulated binding sites and cycling myosin heads in striated muscle. *J. Gen. Physiol.* 143:387–399. <https://doi.org/10.1085/jgp.201311078>.
- Campbell, K. S., P. M. L. Janssen, and S. G. Campbell. 2018. Force-dependent recruitment from the myosin off state contributes to length-dependent activation. *Biophys. J.* 115:543–553. <https://doi.org/10.1016/j.bpj.2018.07.006>.

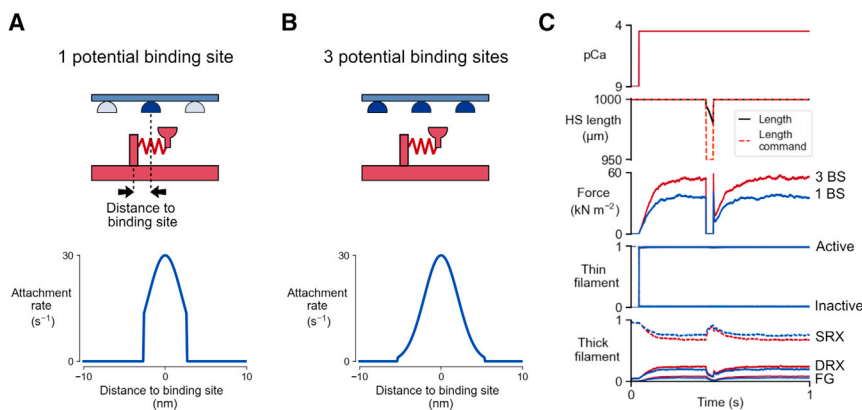

FIG. 8 Slack/re-stretch maneuvers for different numbers of potential binding sites. (A) Myosin heads are allowed to bind to the nearest binding site (top). The gaussian attachment rate profile is thus zero outside of the nearest binding site distance range (bottom). (B) Myosin heads are allowed to bind to one of the three nearest binding sites (top). The gaussian attachment rate profile is thus wider than for the “1 potential binding site” case (bottom). (C) Slack/re-stretch protocols. The half-sarcomere length is suddenly shortened by 5%, then stretched back to its initial value. Immediately after the rapid shortening, the half-sarcomere shortens against zero load (force is zero). During the re-stretch, there is a sudden increase in force, followed by a force drop that does not reach zero (force residual). The isometric and residual forces are greater for simulations with 3 potential binding sites (red) than for 1 potential binding site (blue).

7. Chung, C. S., C. W. Hoopes, and K. S. Campbell. 2017. Myocardial relaxation is accelerated by fast stretch, not reduced afterload. *J. Mol. Cell Cardiol.* 103:65–73. <https://doi.org/10.1016/j.yjmcc.2017.01.004>.
8. Li, A., S. R. Nelson, and D. M. Warshaw. 2019. Skeletal MyBP-C isoforms tune the molecular contractility of divergent skeletal muscle systems. *Proc. Natl. Acad. Sci. U S A.* 116:21882–21892. <https://doi.org/10.1073/pnas.1910549116>.
9. Daniel, T. L., A. C. Trimble, and P. B. Chase. 1998. Compliant realignment of binding sites in muscle: transient behavior and mechanical tuning. *Biophys. J.* 74:1611–1621. [https://doi.org/10.1016/S0006-3495\(98\)77875-0](https://doi.org/10.1016/S0006-3495(98)77875-0).
10. Tanner, B. C. W., T. L. Daniel, and M. Regnier. 2007. Sarcomere lattice geometry influences cooperative myosin binding in muscle. *PLoS Comput. Biol.* 3:1195–1211. <https://doi.org/10.1371/journal.pcbi.0030115>.
11. Fenwick, A. J., A. M. Wood, and B. C. W. Tanner. 2021. The spatial distribution of thin filament activation influences force development and myosin activity in computational models of muscle contraction. *Arch. Biochem. Biophys.* 703:108855. <https://doi.org/10.1016/j.abb.2021.108855>.
12. Mijailovich, S. M., O. Kayser-Herold, and M. A. Geeves. 2016. Three-dimensional stochastic model of actin-myosin binding in the sarcomere lattice. *J. Gen. Physiol.* 148:459–488. <https://doi.org/10.1085/jgp.201611608>.
13. Mijailovich, S. M., M. Prodanovic, and M. Regnier. 2021. Multiscale modeling of twitch contractions in cardiac trabeculae. *J. Gen. Physiol.* 153:e202012604. <https://doi.org/10.1085/JGP.202012604>.
14. Anderson, R. L., D. V. Trivedi, and J. A. Spudich. 2018. Deciphering the super relaxed state of human  $\beta$ -cardiac myosin and the mode of action of mavacamten from myosin molecules to muscle fibers. *Proc. Natl. Acad. Sci. U S A.* 115:E8143–E8152. <https://doi.org/10.1073/pnas.1809540115>.
15. Press, W. H., S. A. Teukolsky, and B. P. Flannery. 2003. *Numerical recipes Second edition: The Art of Scientific Computing*. Cambridge University Press.
16. Wolska, B. M., and D. M. F. Wieczorek. 2003. The role of tropomyosin in the regulation of myocardial contraction and relaxation. *Pflugers Arch.* 446:1–8. <https://doi.org/10.1007/s00424-002-0900-3>.
17. Kampourakis, T., Y. B. Sun, and M. Irving. 2016. Myosin light chain phosphorylation enhances contraction of heart muscle via structural changes in both thick and thin filaments. *Proc. Natl. Acad. Sci. U S A.* 113:E3039–E3047. <https://doi.org/10.1073/pnas.1602776113>.
18. Campbell, K. S. 2006. Filament compliance effects can explain tension overshoots during force development. *Biophys. J.* 91:4102–4109. <https://doi.org/10.1529/biophysj.106.087312>.
19. McNamara, J. W., A. Li, and C. G. Dos Remedios. 2017. MYBPC3 mutations are associated with a reduced super-relaxed state in patients with hypertrophic cardiomyopathy. *PLoS One.* 12:e0180064. <https://doi.org/10.1371/journal.pone.0180064>.
20. McNamara, J. W., A. Li, and R. Cooke. 2016. Ablation of cardiac myosin binding protein-C disrupts the super-relaxed state of myosin in murine cardiomyocytes. *J. Mol. Cell Cardiol.* 94:65–71. <https://doi.org/10.1016/j.yjmcc.2016.03.009>.
21. Harris, S. P. 2020. Making waves: a proposed new role for myosin-binding protein C in regulating oscillatory contractions in vertebrate striated muscle. *J. Gen. Physiol.* 153:e202012729. <https://doi.org/10.1085/JGP.202012729>.
22. Alsulami, K., and S. Marston. 2020. Small molecules acting on myofilaments as treatments for heart and skeletal muscle diseases. *Int. J. Mol. Sci.* 21:9599. <https://doi.org/10.3390/ijms21249599>.
23. Awinda, P. O., Y. Bishaw, and B. C. W. Tanner. 2020. Effects of mavacamten on  $\text{Ca}^{2+}$  sensitivity of contraction as sarcomere length varied in human myocardium. *Br. J. Pharmacol.* 177:5609–5621. <https://doi.org/10.1111/bph.15271>.
24. Kawas, R. F., R. L. Anderson, and H. M. Rodriguez. 2017. A small-molecule modulator of cardiac myosin acts on multiple stages of the myosin chemomechanical cycle. *J. Biol. Chem.* 292:16571–16577. <https://doi.org/10.1074/jbc.M117.776815>.
25. Campbell, K. S., and A. M. Holbrook. 2007. The rate of tension recovery in cardiac muscle correlates with the relative residual tension prevailing after restretch. *Am. J. Physiol. Heart Circ. Physiol.* 292:H2020–H2022. <https://doi.org/10.1152/ajpheart.00714.2006>.
26. Walcott, S., S. Docken, and S. P. Harris. 2015. Effects of cardiac myosin binding protein-C on actin motility are explained with a drag-activation-competition model. *Biophys. J.* 108:10–13. <https://doi.org/10.1016/j.bpj.2014.11.1852>.
27. Campbell, K. S., and M. Lakie. 1998. A cross-bridge mechanism can explain the thixotropic short-range elastic component of relaxed frog skeletal muscle. *J. Physiol.* 510:941–962. <https://doi.org/10.1111/j.1469-7793.1998.941bj.x>.
28. ten Tusscher, K. H., and A. V. Panfilov. 2006. Alternans and spiral breakup in a human ventricular tissue model. *Am. J. Physiol. Heart Circ. Physiol.* 291:H1088–H1100. <https://doi.org/10.1152/ajpheart.00109.2006>.



**Biophysical Journal, Volume 121**

**Supplemental information**

**FiberSim: A flexible open-source model  
of myofilament-level contraction**

**Sarah Kosta, Dylan Colli, Qiang Ye, and Kenneth S. Campbell**

# FiberSim: a flexible open-source model of myofilament-level contraction

## Supporting Material

S. Kosta<sup>1</sup>, D. Colli<sup>1</sup>, Q. Ye<sup>2</sup>, K. S. Campbell<sup>1</sup>

<sup>1</sup> Department of Physiology, University of Kentucky, Lexington, Kentucky, USA

<sup>2</sup> Department of Mathematics, University of Kentucky, Lexington, Kentucky, USA

## ISOMETRIC TWITCH

Fig. S1 shows an isometric twitch simulation similar to the one presented in [https://campbell-muscle-lab.github.io/FiberSim/pages/demos/getting\\_started/isometric\\_twitch/isometric\\_twitch.html](https://campbell-muscle-lab.github.io/FiberSim/pages/demos/getting_started/isometric_twitch/isometric_twitch.html), except that the number of thick filaments is increased from 16 to 196. The simulation takes approximately 30 minutes to run on a standard Windows laptop, using 3 of the 4 processors (meaning that other tasks still can be performed during the FiberSim simulations). As a comparison, an equivalent simulation performed with MUSICO (with 200 thick filaments) takes approximately 10 hours on a system with 192 processors (2).

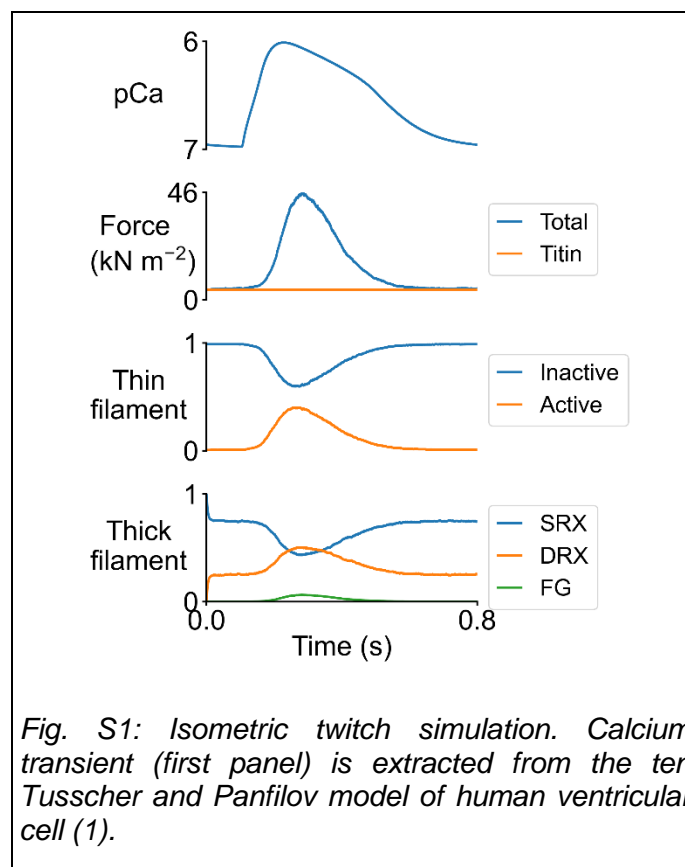

## TIME-STEP

Fig. S2 shows four isometric activations similar to the one presented in [https://campbell-muscle-lab.github.io/FiberSim/pages/demos/getting\\_started/isometric\\_activation/isometric\\_activation.html](https://campbell-muscle-lab.github.io/FiberSim/pages/demos/getting_started/isometric_activation/isometric_activation.html). Each simulation is run with a different (constant) time-step.

Since the thin filament kinetics model is associated with the fastest rates, this will determine the maximal time-step we should use. The probability for a regulatory unit to activate is calculated using  $k_{on} \cdot [Ca^{2+}]$ , where in the model files from the presented demos  $k_{on}$  is equal to  $3 \cdot 10^7 \text{ M}^{-1} \text{ s}^{-1}$ . Thus, for an isometric activation such as the one presented in Fig. S2, the activation rate is given by  $3 \cdot 10^7 \cdot 10^{-4} = 3000 \text{ s}^{-1}$ . The chosen time-step  $\Delta t$  should be small enough so that  $\Delta t < \frac{1}{3000} \sim 3 \cdot 10^{-4} \text{ s}$ . We chose to work with  $\Delta t = 10^{-4} \text{ s}$  in all the simulations presented in this paper. According to Fig. S2, this step size is enough to accurately describe thin and thick filaments activation while keeping a reasonable computational time.

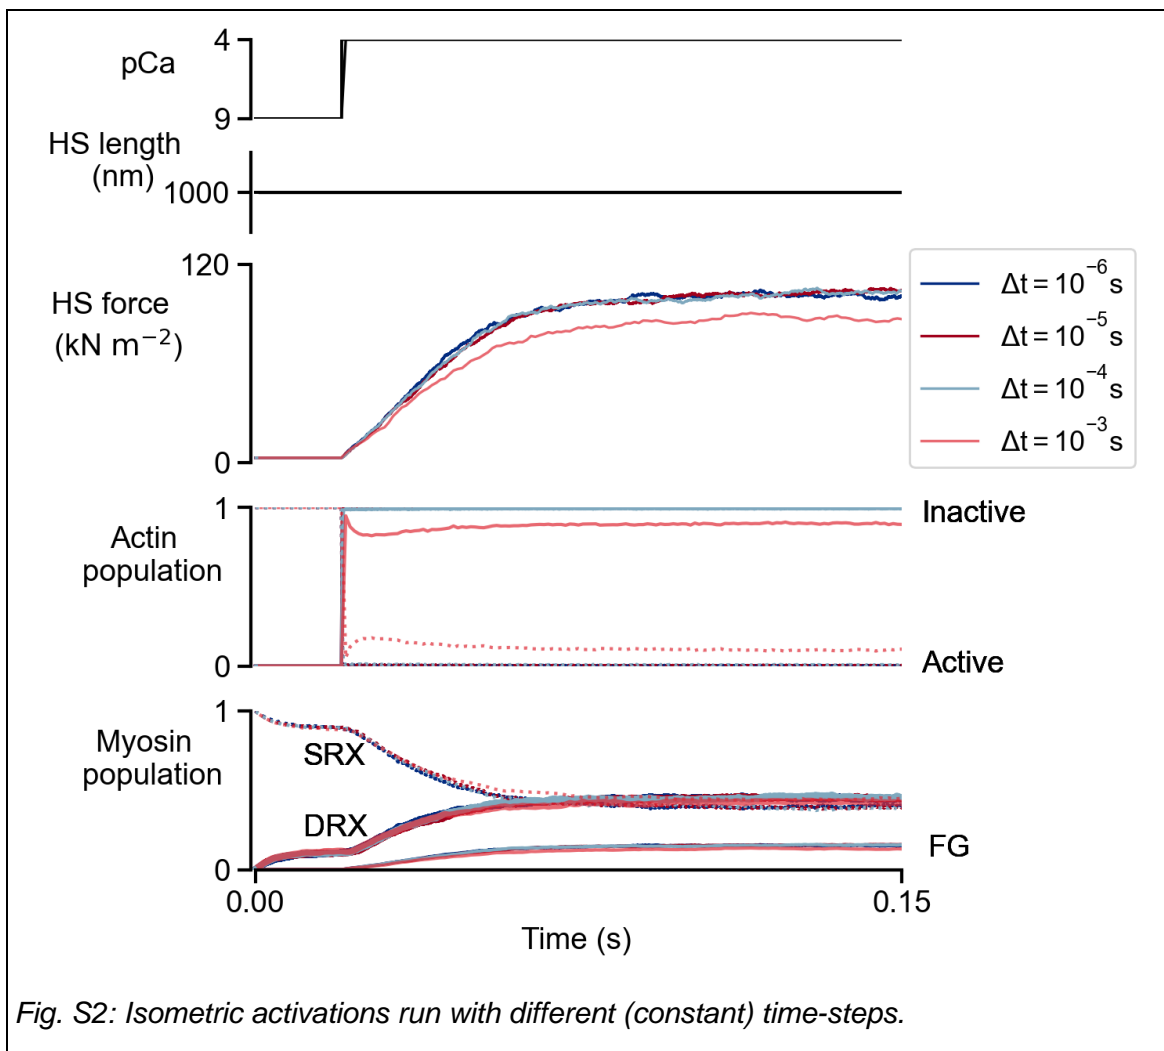

## THIN FILAMENT ACTIVATION CURVES

Fig. S3 shows two thin filament activation curves. The active binding sites proportion is calculated at different calcium concentrations in the absence of cross-bridges. When cooperativity is turned off ( $\gamma_{\text{coop}} = 0$ ), the Hill coefficient is close to 1. When cooperativity is turned on ( $\gamma_{\text{coop}} = 10$ ), the Hill coefficient increases to  $\sim 4$ . This last curve is in good agreement with the experimental data from (3).

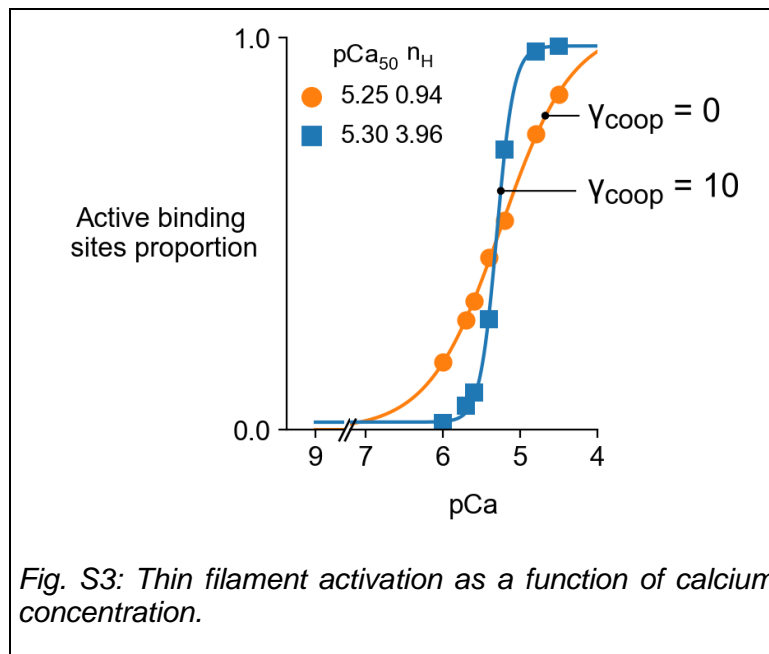

## SUPPORTING REFERENCES

1. ten Tusscher, K. H., and A. V. Panfilov. 2006. Alternans and spiral breakup in a human ventricular tissue model. *Am J Physiol Heart Circ Physiol.* 291(3):H1088-1100, doi: 10.1152/ajpheart.00109.2006.
2. Mijailovich, S. M., M. Prodanovic, C. Poggese, M. A. Geeves, and M. Regnier. 2021. Multiscale modeling of twitch contractions in cardiac trabeculae. *J Gen Physiol.* 153(3):e202012604, doi: 10.1085/JGP.202012604.
3. Kampourakis, T., Y. B. Sun, and M. Irving. 2016. Myosin light chain phosphorylation enhances contraction of heart muscle via structural changes in both thick and thin filaments. *Proc Natl Acad Sci U S A.* 113:E3039-E3047, doi: 10.1073/pnas.1602776113.
